# Supplementary material for: The Effects of Insulin-Like Growth Factor I and BTP-2 on Acute Lung Injury
Source: MDPI journal article supplement (doi:10.3390/ijms22105244), 2021-05-15
Supplement: s1 [file s1]

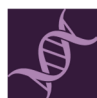

**Table S1. Primer list..**

| Gene        | Forward                 | Reverse                 |
|-------------|-------------------------|-------------------------|
| TLR-4       | GCCTTTCAGGGAATTAAGCTCC  | GATCAACCGATGGACGTGTAAA  |
| NFATC1      | GGAGAGTCCGAGAATCGAGAT   | TTGCAGCTAGGAAGTACGTCT   |
| TRPC6       | GCTTCCGGGGTAATGAAAACA   | GTATGCTGGTCCTCGATTAGC   |
| TRPC3       | GCCTTCATGTTCGGTGCTC     | GGTCACCTCCAGATGCTCATT   |
| ORAI 1      | CTCAACTCGGTCAAAGAGTCAC  | CACGACCTCTGCTAGGAAAAG   |
| CALCINEURIN | GTGAAAGCCGTTCCATTTC     | GAATCGAAGCACCTCTGTTATT  |
| IL-1B       | GAAATGCCACCTTTTGACAGTG  | TGGATGCTCTCATCAGGACAG   |
| IL-17       | GGCCCTCAGACTACCTCAAC    | TCTCGACCCTGAAAGTGAAGG   |
| IL-6        | CTGCAAGAGACTTCCATCCAG   | AGTGGTATAGACAGGTCTGTTGG |
| TNF-A       | CCTGTAGCCACGTCGTAG      | GGGAGTAGACAAGGTACAACCC  |
| IFN-g       | ATGAACGCTACACACTGCATC   | CCATCCTTTTGCCAGTTCCTC   |
| CD-31       | CTGCCAGTCCGAAAATGGAAC   | CTTCATCCACCGGGGCTATC    |
| VEGF        | GCACATAGAGAGAATGAGCTTCC | CTCCGCTCTGAACAAGGCT     |
| A-SMA       | GTCCCAGACATCAGGGAGTAA   | TCGGATACTTCAGCGTCAGGA   |
| SP-D        | CTCCCACTATCAGAAAGCTGC   | CCCACATCTGTCATACTCAGGAA |
| CASPASE 3   | ATGGAGAACAACAAACCTCAGT  | TTGCTCCCATGTATGGTCTTTAC |
| NGAL        | GGGAAATATGCACAGGTATCCTC | CATGGCGAACTGGTTGTAGTC   |
| GAPDH       | TGGCCTTCCGTGTTTCCTAC    | GAGTTGCTGTTGAAGTCGCA    |

Notes: TLR-4: Toll-like receptor 4, NFATC1: Nuclear factor of activated T cells 1; TRPC3: Transient receptor potential cation channel subfamily C member 3, TRPC6: Transient receptor potential cation channel subfamily C member 6, ORAI-1: ORAI calcium release-activated calcium modulator 1, IL-1B: Interleukin 1 beta, IL-17: Interleukin 17; IL-6: Interleukin-6; TNF- $\alpha$ : Tumor Necrosis Factor - $\alpha$ , IFN-g: Interferon Gamma, CD-31: Platelet/endothelial cell adhesion molecule 1, VEGF: Vascular endothelial growth factor, a-SMA: Alpha Smooth Muscle actin, NGAL: Lipocalin 2; GAPDH: Glyceraldehyde-3-Phosphate Dehydrogenase.
